# Supplementary material for: Reactivation of Notch signaling is required for cardiac valve regeneration
Source: PubMed Central journal article supplement (PMC6831700; doi:10.1038/s41598-019-52558-y), 2019-11-05

## ***Supplementary material***

**Title: Reactivation of Notch signaling is required for cardiac valve regeneration**

**Short title: Notch is required for Cardiac Valve regeneration**

**Authors:** Panagiotis Kefalos <sup>1,2</sup>, Adamantia Agalou <sup>1</sup>, Koichi Kawakami <sup>3</sup>, Dimitris Beis <sup>1\*</sup>.

**Affiliations:**

<sup>1</sup>Zebrafish Disease Model lab, Center for Experimental Surgery, Clinical and Translational Research, Biomedical Research Foundation, Academy of Athens, GR11527, Greece.  
Tel:+302106597197; fax:+302106597545.

<sup>2</sup>Department of Biology, University of Patras, GR26504, Greece.

<sup>3</sup>Division of Molecular and Developmental Biology, National Institute of Genetics, and Department of Genetics, SOKENDAI (The Graduate University for Advanced Studies), Mishima 411-8540, Japan. Tel:+81559816740; fax +81559815827.

\*Correspondence to: [dbeis@bioacademy.gr](mailto:dbeis@bioacademy.gr)

Original Article

### **Supplementary material figure legends**

**Supplementary Figure 1. Expression patterns of the 2 Gal4 transgenic lines used for the valve regeneration studies. A-A'.** Expression pattern of a hspGFFDMC73A transgenic embryo 3dpf. (Scale bars: 100 and 200µm respectively) **B.** Confocal stack of the expression pattern of the hspGFFDMC73A Gal4 line. Arrows show atrioventricular canal (AV) and bulbus arteriosus (BA). Scale bar: 20µm. **C.** Confocal z-stack showing partial colocalization (cells shown with arrows) of hspGFFDMC73A with the *Tg(7xTCF-Xla.Siam:nlsmCherry)* Scale bar: 50 microns **D-D'.** Expression pattern of a gSAIzGFFD703A transgenic embryo 3dpf (Scale bars: 100 and 200µm respectively). **E.** Confocal stack of the expression pattern of gSAIzGFFD703A gal4 series. Arrows show atrioventricular canal (AV) and bulbus arteriosus (BA). Scale bar: 20µm. **F.** Confocal z-stack of the *Tg(7xTCF-Xla.Siam:nlsmCherry)* mesenchymal pattern colocalizing with very few gSAIzGFFD703A cells. Scale bar: 50 microns.

**Supplementary Figure 2. Quantification of valve cells' ablation and regeneration in larvae. A.** A statistically significant difference in the number of mCherry positive cells shows successful and efficient ablation of cardiac valves in MTZ treated 4dpf hspGFFDMC73A/*UAS-E1b:NfsB-mCherry* embryos ( $p < 0,001$ ). **B.** At 12 dpf, MTZ treated larvae have more mCherry positive cells than 4dpf, indicating proliferation but still significantly less than the untreated ( $p < 0,01$ ), showing that the regeneration process is still ongoing at this stage. Two-paired t-test was used for the statistic analysis ( $n > 5$  for all comparisons)

**Supplementary Figure 3. Quantification of the reverse blood flow fraction (% of frames where retrograde blood flow is observed/cardiac beat).** MTZ treatment at 4dpf (**A**) results in an increase of the retrograde blood flow fraction ( $p < 0,01$ , two-paired t-test). By 12dpf, no statistically significant difference can be observed between wild-type and regenerating larvae ( $n = 8$  and  $n = 5$  animals imaged per sample at each developmental stage respectively) **B,C.** Snapshot and mean flow pattern for ctrl and MTZ treated embryos respectively at 4dpf **E,F.** Snapshot and mean flow pattern for ctrl and MTZ treated larvae (8days post treatment) respectively at 12dpf. Retrograde blood flow after "+" prior to next heartbeat was not observed at all 12dpf larvae.

**Supplementary Figure 4. Apoptosis detection in MTZ-treated hspGFFDMC73A/*UAS-E1b:NfsB-mCherry* embryos using the TUNEL assay. A-E.** Z-stack projection of an untreated hspGFFDMC73A/*UAS-E1b:NfsB-mCherry* embryo stained with TUNEL assay (green) and DmGrasp (blue). **F-J.** Z-stack projection of an MTZ treated hspGFFDMC73A/*UAS-E1b:NfsB-mCherry* embryo 4dpf. Apoptotic cells are detected at the AV canal and BA areas (arrows). Scale bars: 50 microns.

**Supplementary Figure 5. Re-activation of *klf2a* and *notch1b* after chemically induced valve damage. A-A'.** *In situ* hybridization with *klf2a* probe of a wild-type 5dpf larva. Scale bar 50 microns. **B-B'.** Expansion of *klf2a* expression in the heart of an hspGFFDMC73A:*UAS-E1b:NfsB-mCherry* transgenic larva 5dpf, 1 day post treatment with MTZ. Scale bar: 50 microns. **C-C'.** *In situ* hybridization with *notch1b* probe of a wild-type 5dpf larva. **D-D'.** Expansion of *notch1b* expression in the heart of an hspGFFDMC73A: *UAS-E1b:NfsB-mCherry* transgenic larva at 5dpf, 1 day post treatment with MTZ.  $N > 30$  embryos per treatment.

**Supplementary Figure 6. Quantification of valve cells' regeneration with and without Notch inhibition in larvae (related to results of Figure 3). A-B.** Quantification of mCherry positive cells at 6dpf (2days post MTZ treatment) in hspGFFDMC73A/*UAS-E1b:NfsB-mCherry* and gSAIzGFFD703A/*UAS-E1b:NfsB-mCherry* larvae shows a significant reduction in the number of regenerating cells with the addition of DAPT following cardiac valve cell ablation. Two-paired t-test was used for the statistic analysis ( $n > 5$ ,  $p < 0,001$  for both GAL4 transgenic lines).

**Supplementary Figure 7. Apoptosis detection in MTZ treated hspGFFDMC73A/*UAS-E1b:NfsB-mCherry* adult hearts using the TUNEL assay. A-E.** Z-stack projection of an elastin stained adult valve of an untreated hspGFFDMC73A/*UAS-E1b:NfsB-mCherry*.

Numbers (1-4) indicate the 4 leaflets of the adult valve. F-J Z-stack projection of an elastin stained adult valve of an MTZ treated *hspGFFDMC73A/UAS-E1b:NfsB-mCherry* fish, immediately following MTZ treatment (12hours, 5mM). Apoptotic cells (arrows) are detected in the leaflets. Apoptosis is also detectable in what seems to be blood cells. Scale bars: 50 microns.

**Supplementary Figure 8. Notch signaling is upregulated following adult cardiac valve injury. A-B.** Notch signaling is active as documented by the *Tg(Tp1:venus-PEST)* in an adult *hspGFFDMC73A/UAS-E1b:NfsB-mCherry/Tp1:venus-PEST* transgenic fish **C-D.** 3days following MTZ treatment to induce valvular damage Notch reporter is significantly upregulated in the AV valve region. **E.** The quantification of *tp1+* cells shows upregulation of Notch signaling, following cardiac valve injury (n=7 hearts, two-paired t-test analysis,  $p < 0,01$ ). Scalebars: 50micron.

**Supplementary video 1.** Intracardiac flow pattern of a wild-type zebrafish embryo at 4dpf used for the quantifications of Figure 1E and Supplementary Figure 3.

**Supplementary video 2.** Intracardiac flow pattern shows an increase in the retrograde blood flow fraction of an MTZ treated *gSAIzGFFD703A/UAS-E1b:NfsB-mCherry* zebrafish embryo at 4dpf (1 day following MTZ treatment), used for the quantifications of Figure 1I and Supplementary Figure 3.

**Supplementary video 3.** Intracardiac flow pattern of a wild-type zebrafish 12dpf larva

**Supplementary video 4.** Intracardiac flow pattern of a 12dpf *gSAIzGFFD703A/UAS-E1b:NfsB-mCherry* larva treated with MTZ at 3dpf.

**Supplementary video 5.** 3D reconstruction of an adult valve of a double *hspGFFDMC73A/UAS-E1b:NfsB-mCherry/ UAS:eGFP1A* transgenic stained with elastin2.

**Supplementary video 6.** 3D reconstruction of an adult valve of a *hspGFFDMC73A/UAS-E1b:NfsB-mCherry/ UAS:eGFP1A* transgenic treated with MTZ and stained with elastin2.

**Supplementary video 7.** 3D reconstruction of an adult valve of a *Tp1:venusPEST* transgenic stained with elastin2.

**Supplementary video 8.** 3D reconstruction of an adult valve of *Tp1:venusPEST* transgenic 3days after MTZ treatment in a *hspGFFDMC73A/UAS-E1b:NfsB--mCherry* transgenic showing upregulation of expression, stained with elastin2.

**Supplementary video 9.** 3D reconstruction of a regenerating adult valve of a *hspGFFDMC73A/UAS-E1b:NfsB-mCherry/UAS:eGFP1A* transgenic, post MTZ ablation and stained with elastin2.

**Supplementary video 10.** 3D reconstruction of an adult valve of a *hspGFFDMC73A/UAS-E1b:NfsB-mCherry/UAS:eGFP1A* transgenic treated with DAPT following up the MTZ ablation, and stained with elastin2.

**Supplementary Figure 1. Expression patterns of the 2 Gal4 transgenic lines used for the valve regeneration studies.**

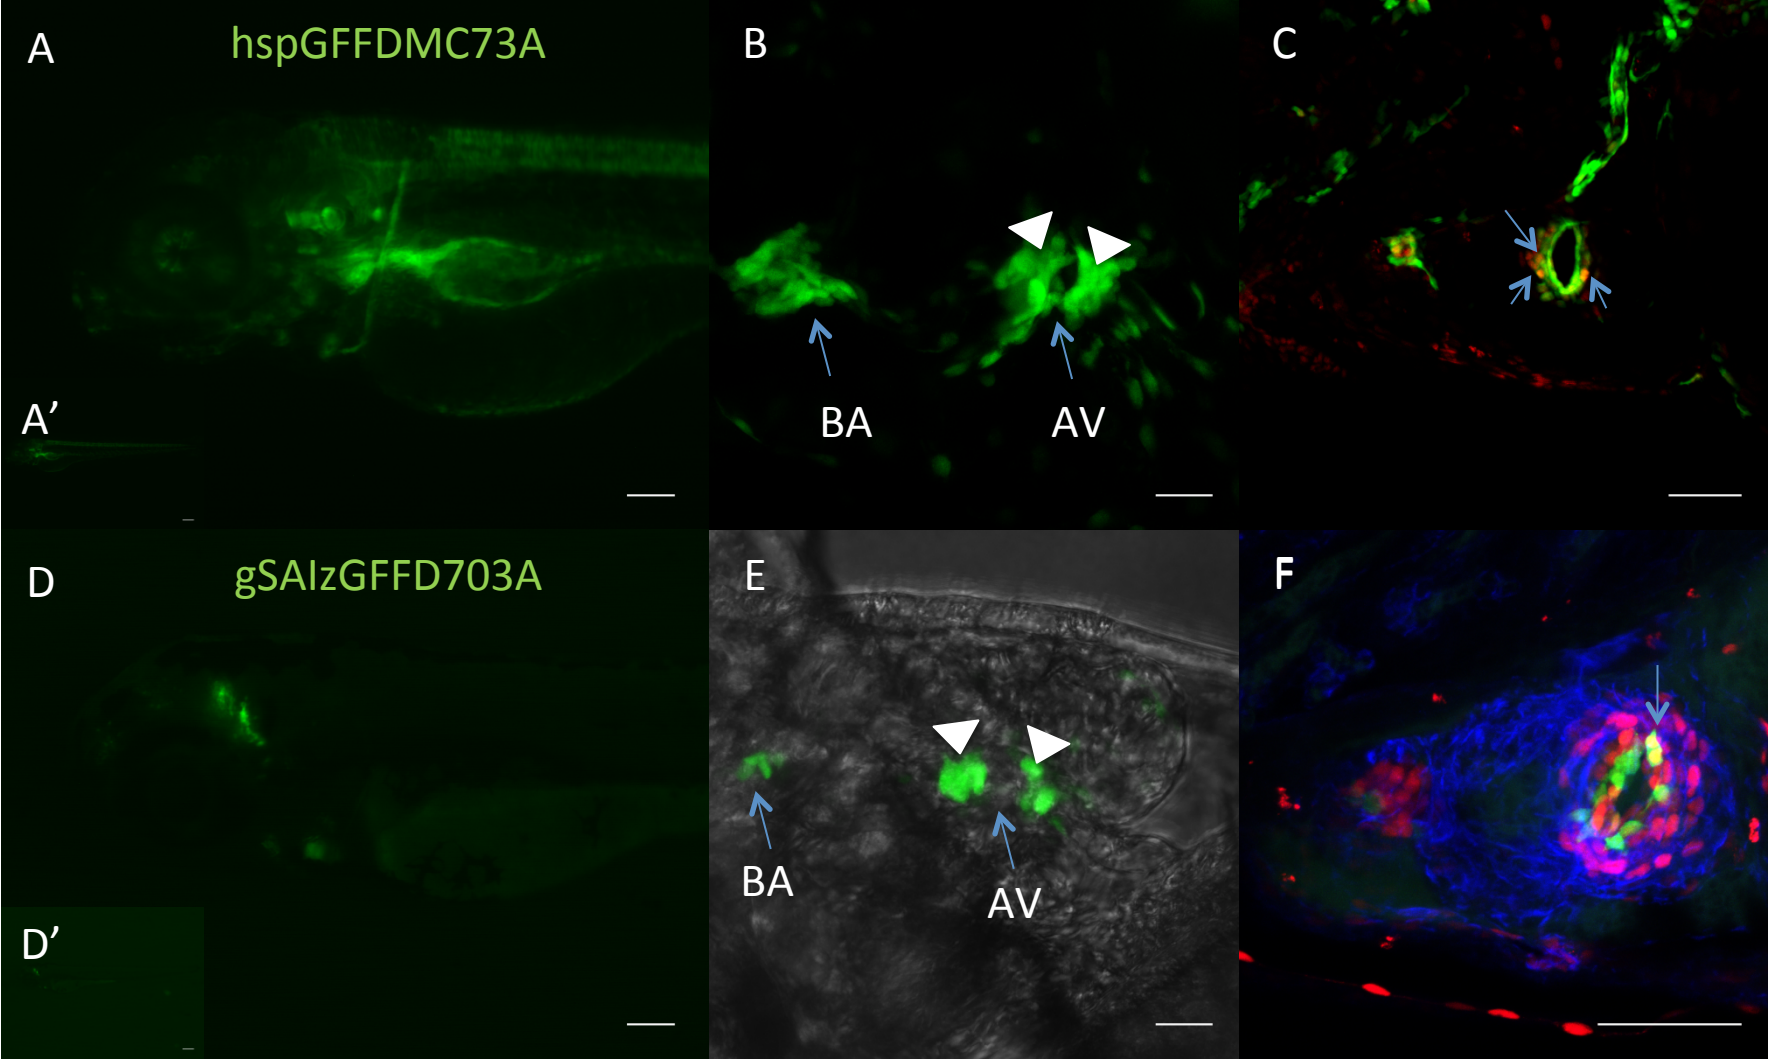

# Supplementary Figure 2. Quantification of valve cells' ablation and regeneration in larvae.

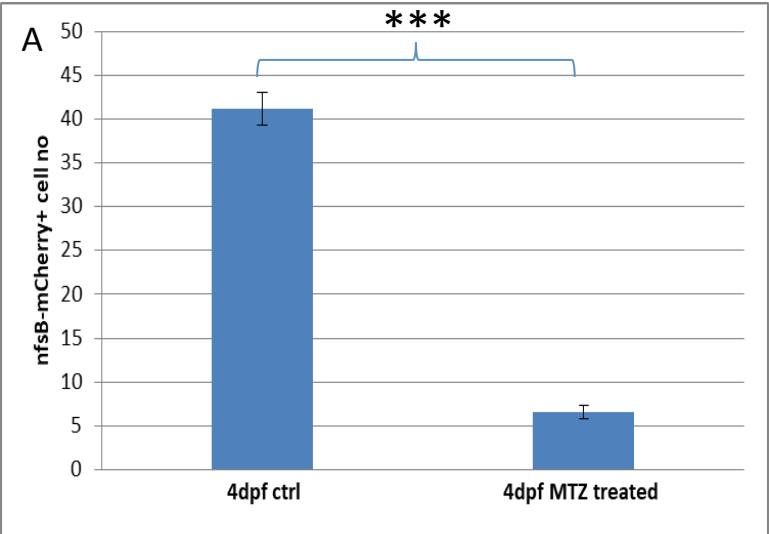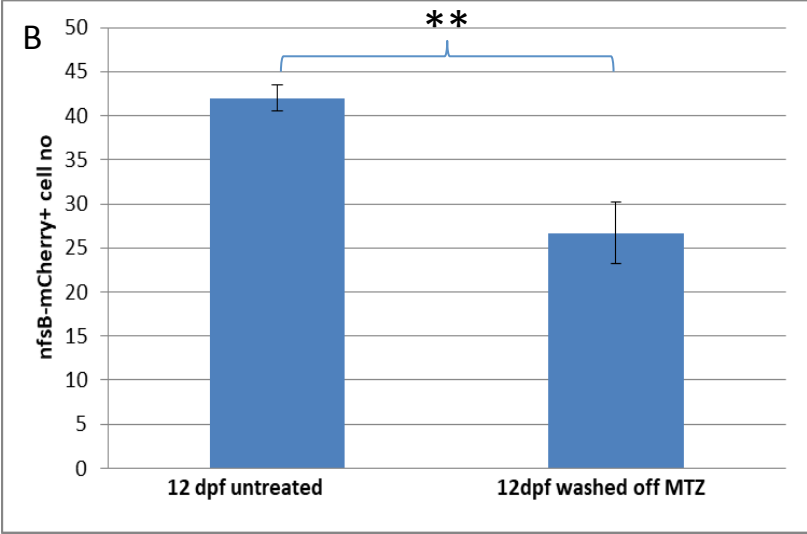

# Supplementary Figure 3. Quantification of the reverse blood flow fraction (% of frames where retrograde blood flow is observed/cardiac beat).

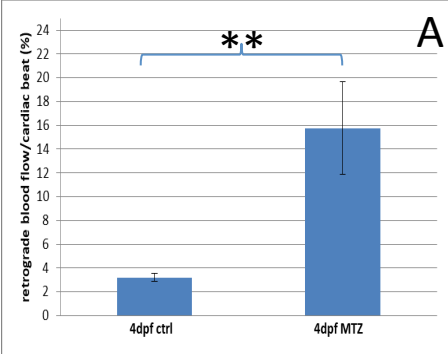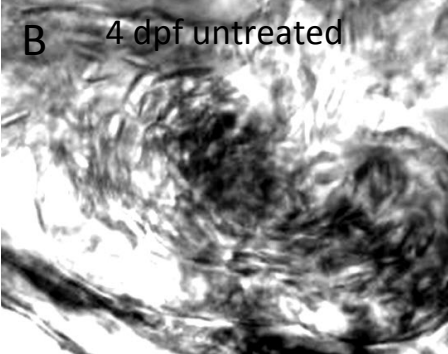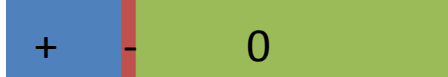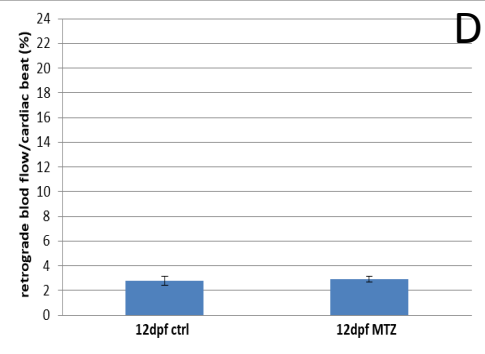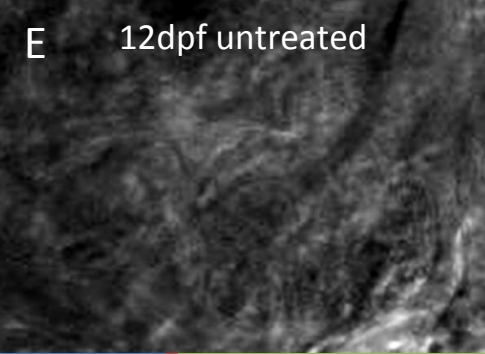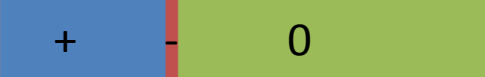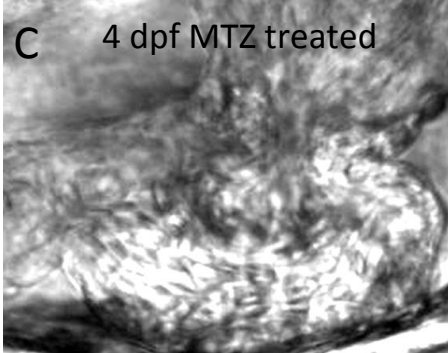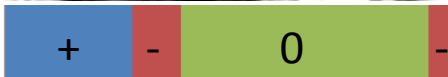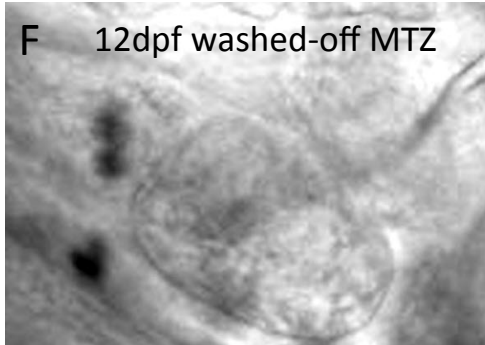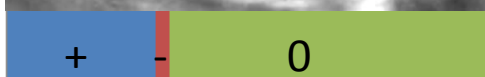

**Supplementary Figure 4. Apoptosis detection in MTZ-treated *hspGFFDMC73A/ UAS-E1b:NfsB-mCherry* embryos using the TUNEL assay.**

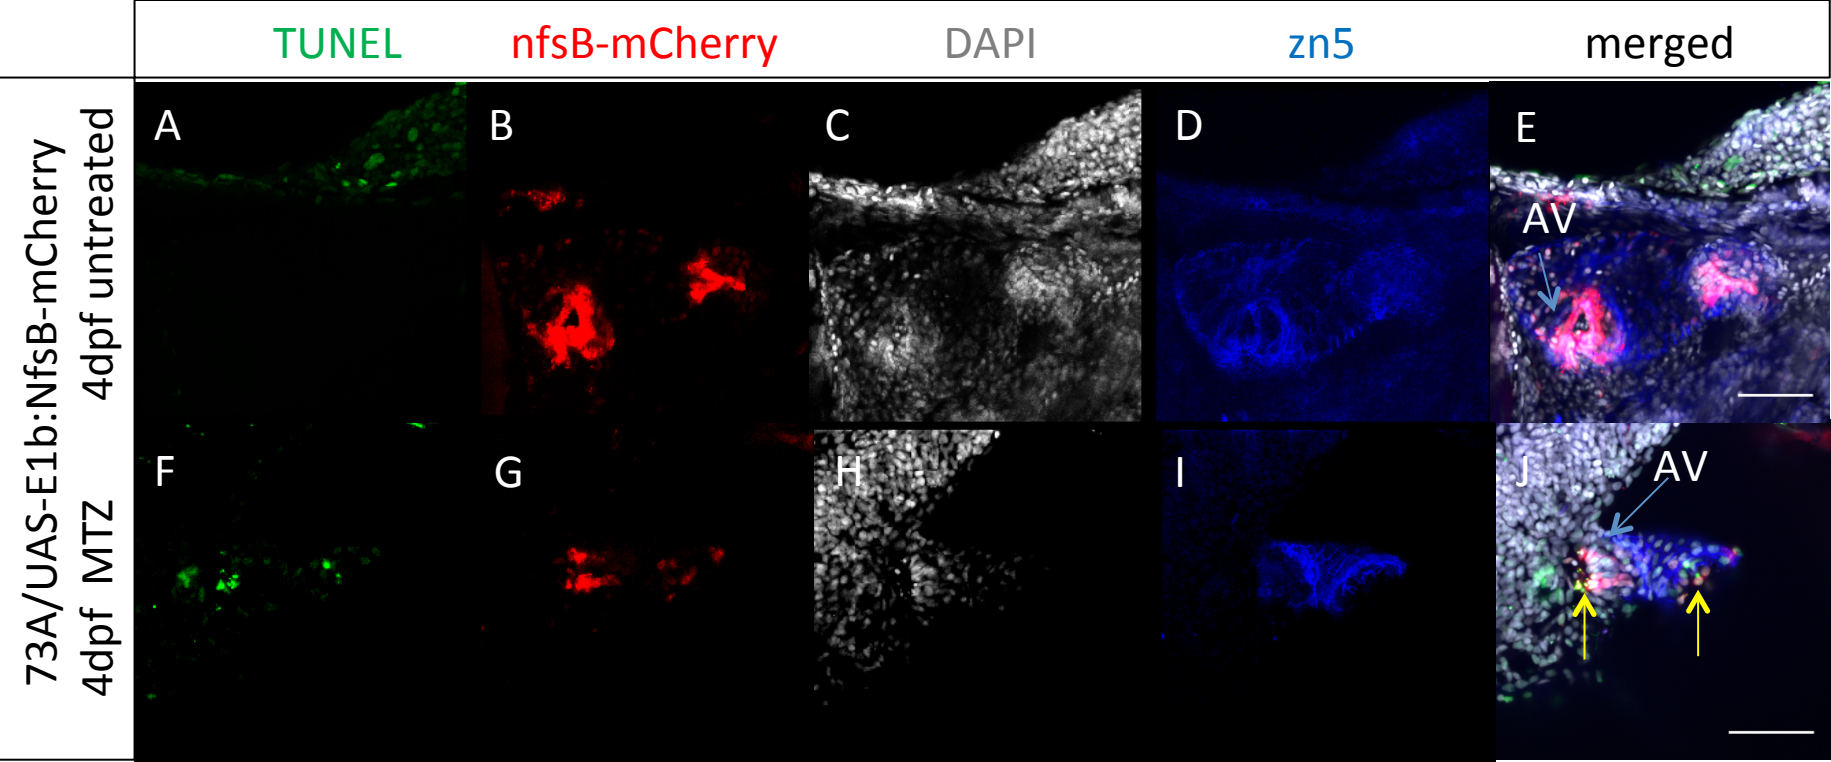

# Supplementary Figure 5. Re-activation of *klf2a* and *notch1b* after chemically induced valve damage.

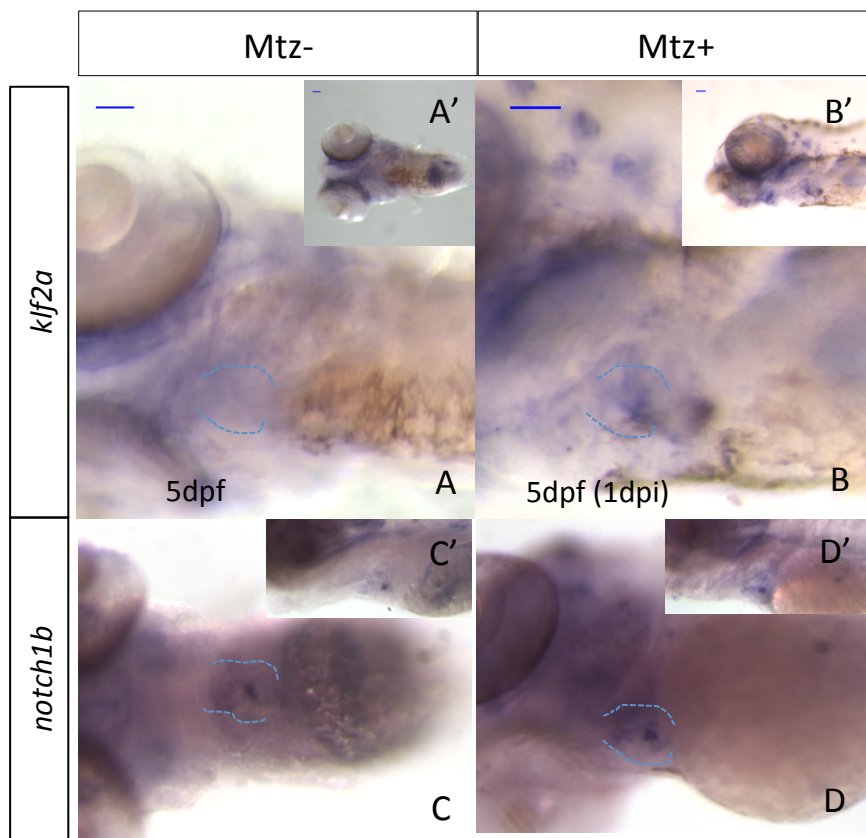



**Supplementary Figure 6. Quantification of valve cells' regeneration with and without Notch inhibition in larvae (related to results of Figure 3).**

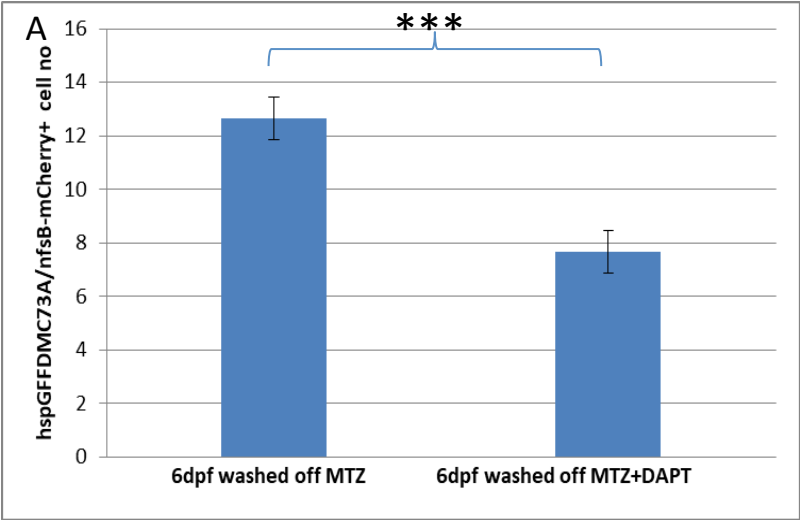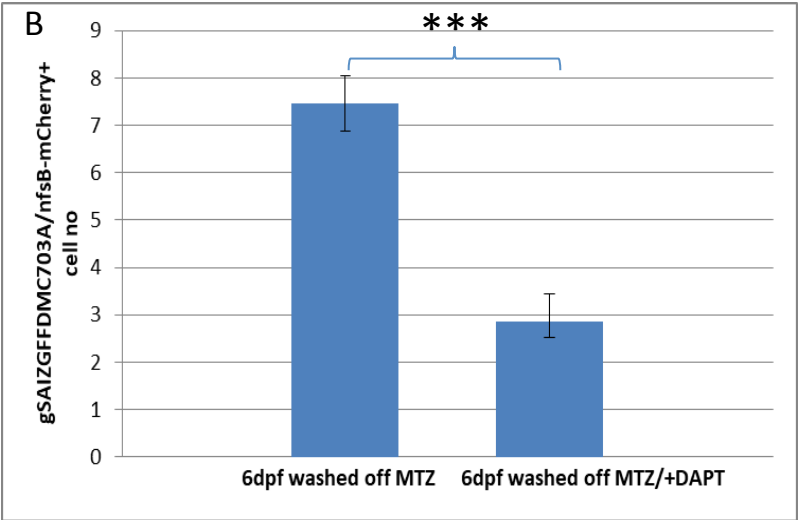

**Supplementary Figure 7. Apoptosis detection in MTZ treated *hspGFFDMC73A/ UAS-E1b:NfsB-mCherry* adult hearts using the TUNEL assay.**

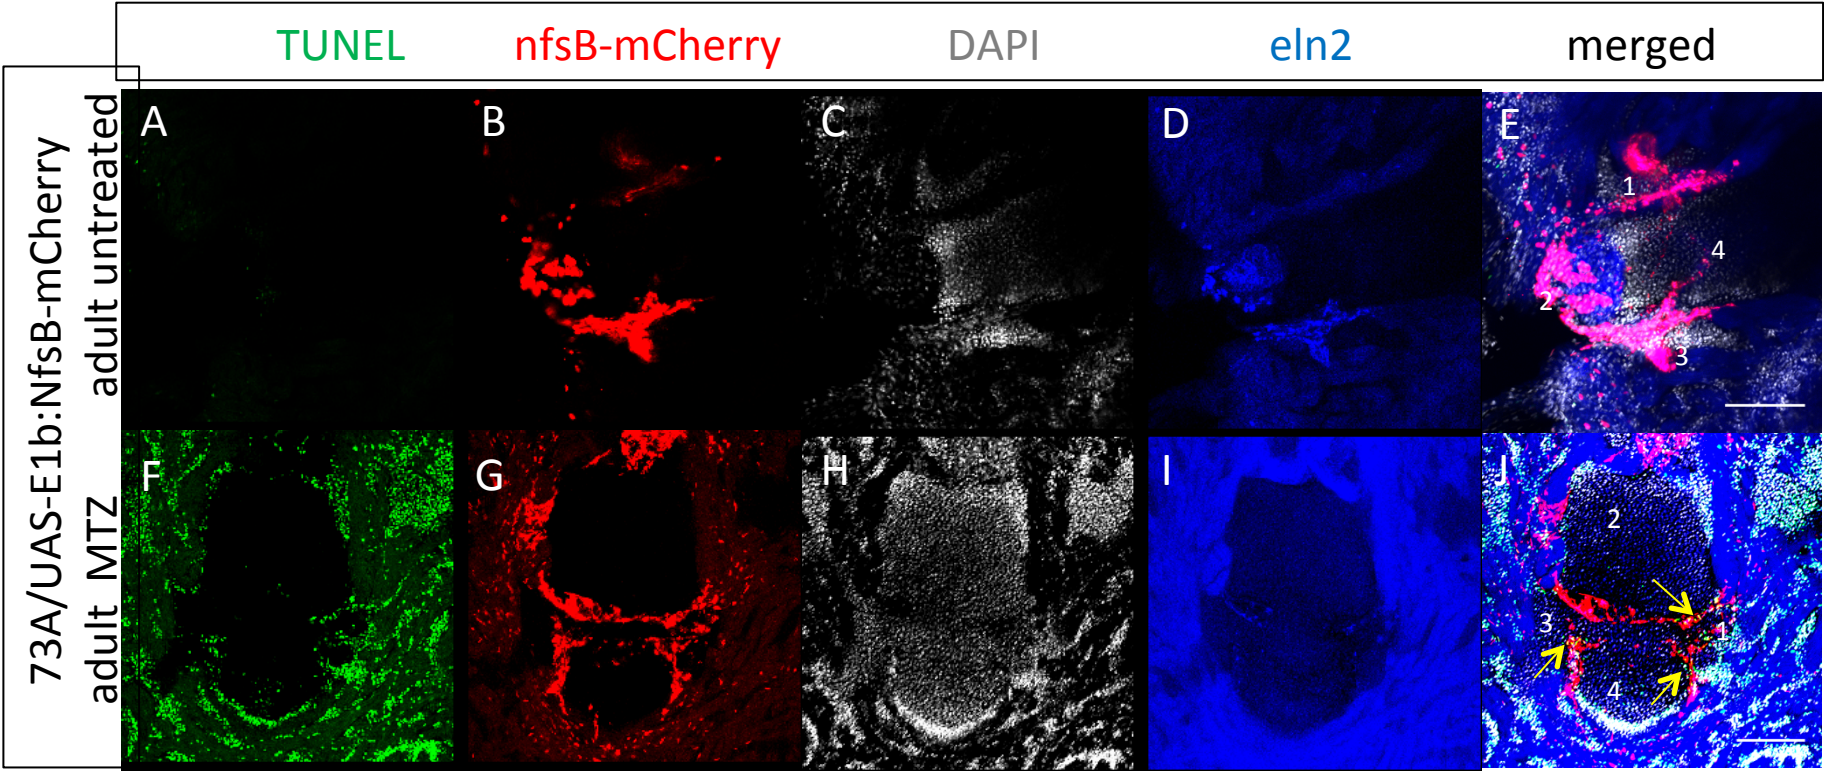

**Supplementary Figure 8. Notch signaling is upregulated following adult cardiac valve injury.**

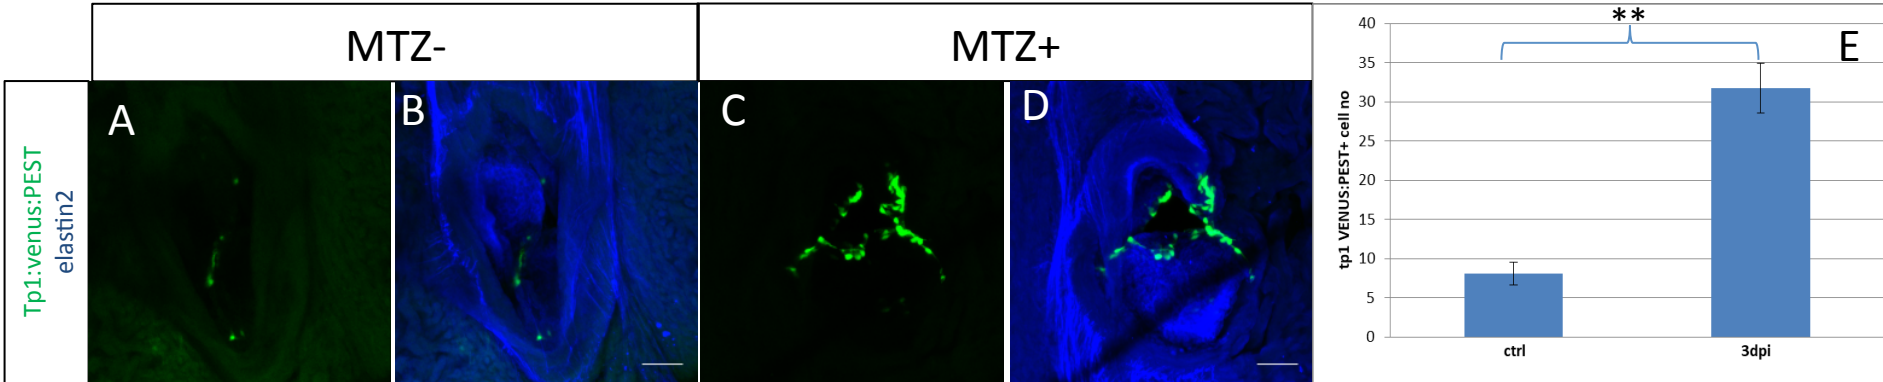

Supplement: 41598_2019_52558_MOESM11_ESM.pdf [file 41598_2019_52558_MOESM11_ESM.pdf]
